# Supplementary material for: Growth of the metal–organic framework ZIF-67 on cellulosic substrates for triboelectric nanogenerators
Source: Royal Society of Chemistry journal article supplement (doi:10.1039/d4nr03909b), 2024-12-13
Supplement: d4nr03909b1.pdf [file d4nr03909b1.pdf]

## **Growth of metal-organic framework ZIF-67 on cellulosic substrates for triboelectric nanogenerators**

*Gaurav Khandelwal<sup>1\*</sup>, Dina Anna John<sup>1</sup>, Venkateswaran Vivekananthan<sup>2</sup>, Nikolaj Gadegaard<sup>1</sup>, Daniel M. Mulvihill<sup>1\*</sup> and Sang-Jae Kim<sup>3\*</sup>*

### **Supporting Information**

**Figure S1.** EDS mapping images for 5-cyc grown ZIF-67.

**Figure S2.** Illustration of the device working mechanism.

**Figure S3.** Image of the test depicting a linear motor mounted on an optical table.

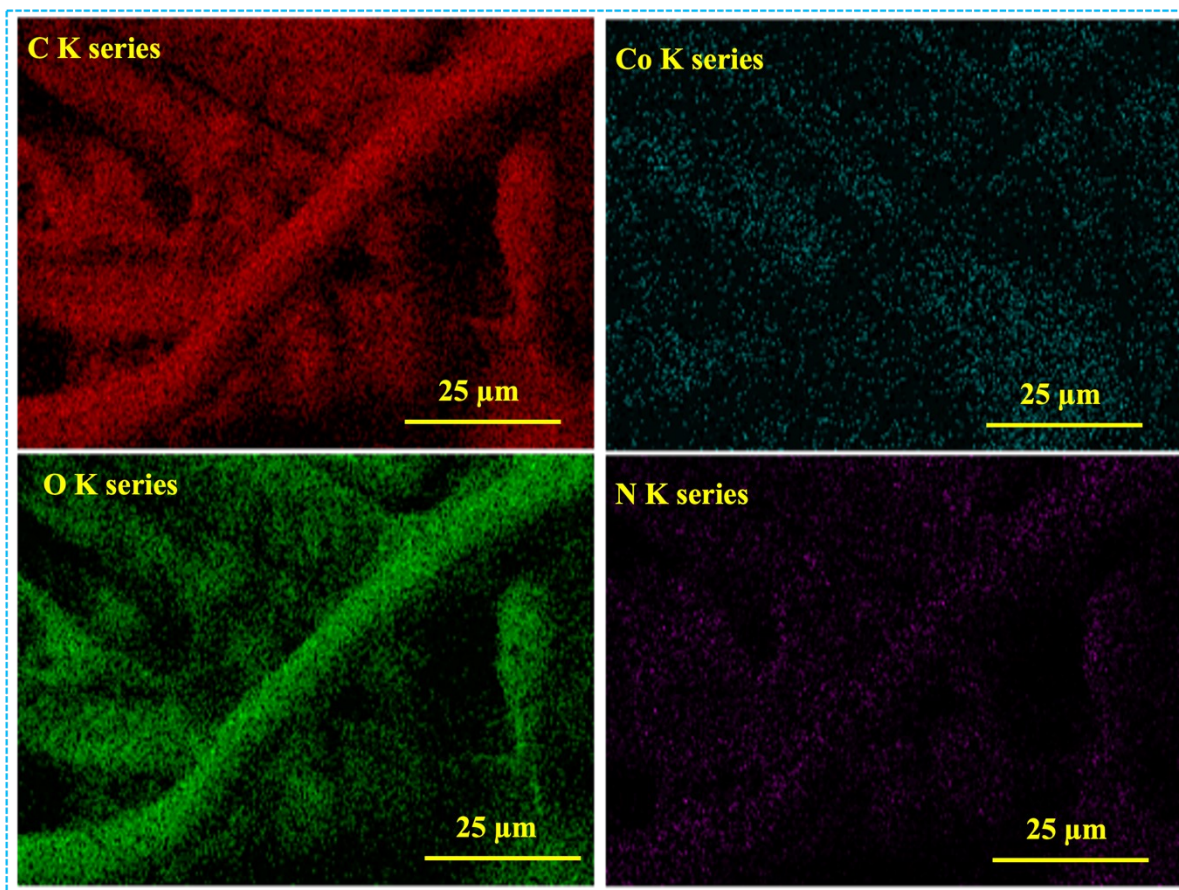

**Figure S1.** EDS mapping images for 5-cyc grown ZIF-67.

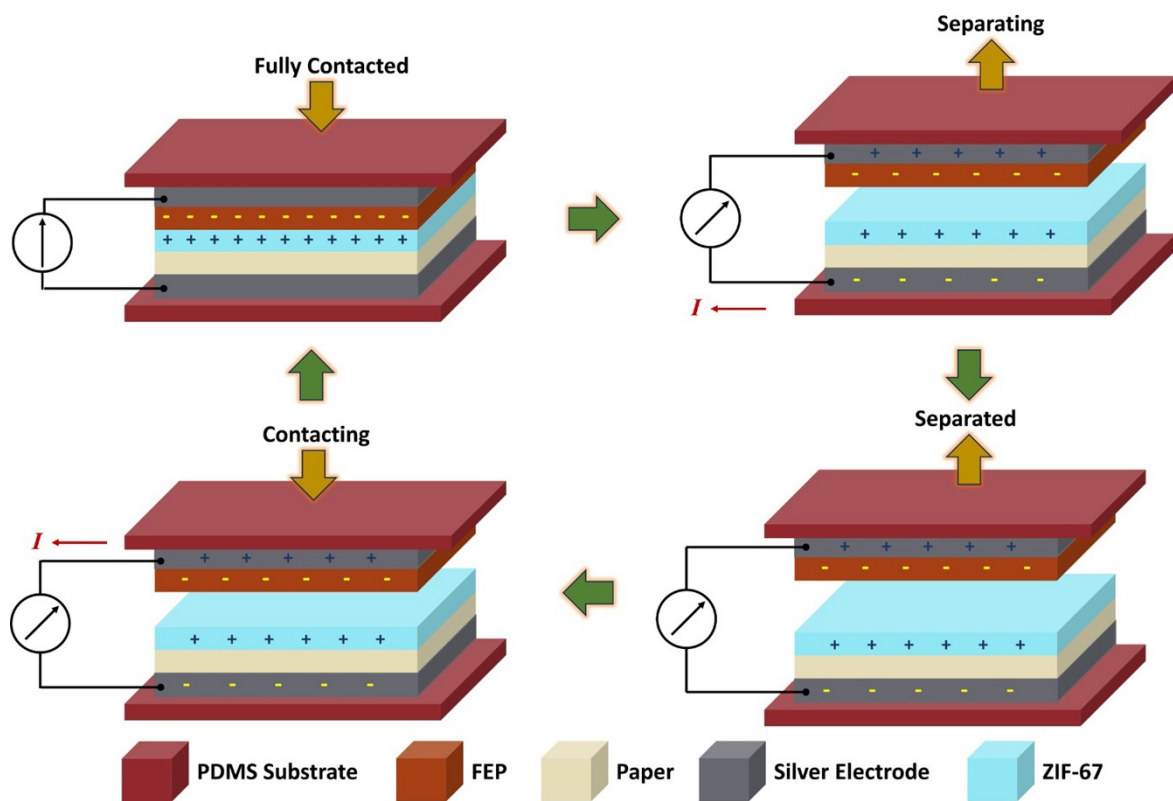

**Figure S2.** Illustration of the device working mechanism.

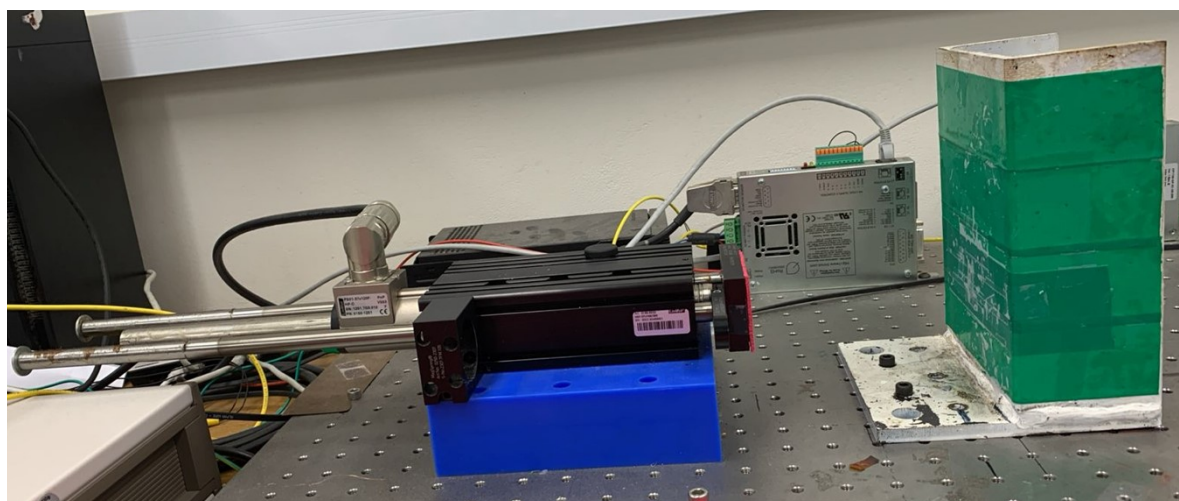

**Figure S3.** Image of the test depicting a linear motor mounted on an optical table.
